# Supplementary material for: Finding the Way with a Noisy Brain
Source: PLoS Comput Biol. 2010 Nov 11;6(11):e1000992. doi: 10.1371/journal.pcbi.1000992 (PMC2978673; doi:10.1371/journal.pcbi.1000992)
Supplement: Table S1 — Parametric error accumulation equations describing trajectories in 2D real and representational space for directed walks consisting of general elementary steps. (0.10 MB DOC) [file pcbi.1000992.s002.doc]

**Table S1 – Parametric error accumulation equations describing trajectories in 2D real and representational space for directed walks consisting of general elementary steps.** Equations show the displacement associated with any step *m* after a total of *n* steps have been taken (i.e. ). Superscripts a and b refer to errors associated with the first and second angular components of a general elementary step respectively (see [*21*] for details).

| Type of Directed Walk | Representational displacement† | Real displacement† |
| --- | --- | --- |
| ADW |  |  |
| IDW |  |  |
| Type of Spatial Representation | Real displacement† | Representational displacement‡ |
| ASVR |  |  |
| ADVR |  |  |
| ESVR |  |  |
| EDVR |  |  |

†In allocentric Cartesian coordinates.

‡In allocentric or egocentric Cartesian coordinates according to spatial representation.
